# Supplementary material for: Deficiency of histone lysine methyltransferase SETDB2 in hematopoietic cells promotes vascular inflammation and accelerates atherosclerosis
Source: JCI journal article supplement (doi:10.1172/jci.insight.147984), 2021-05-18
Supplement: sd1 [file 1]

You are being redirected.
